# Supplementary material
Source: PubMed Central journal article supplement (PMC4234187)
Supplement: NIHMS632226-supplement-1.pdf [file NIHMS632226-supplement-1.pdf]

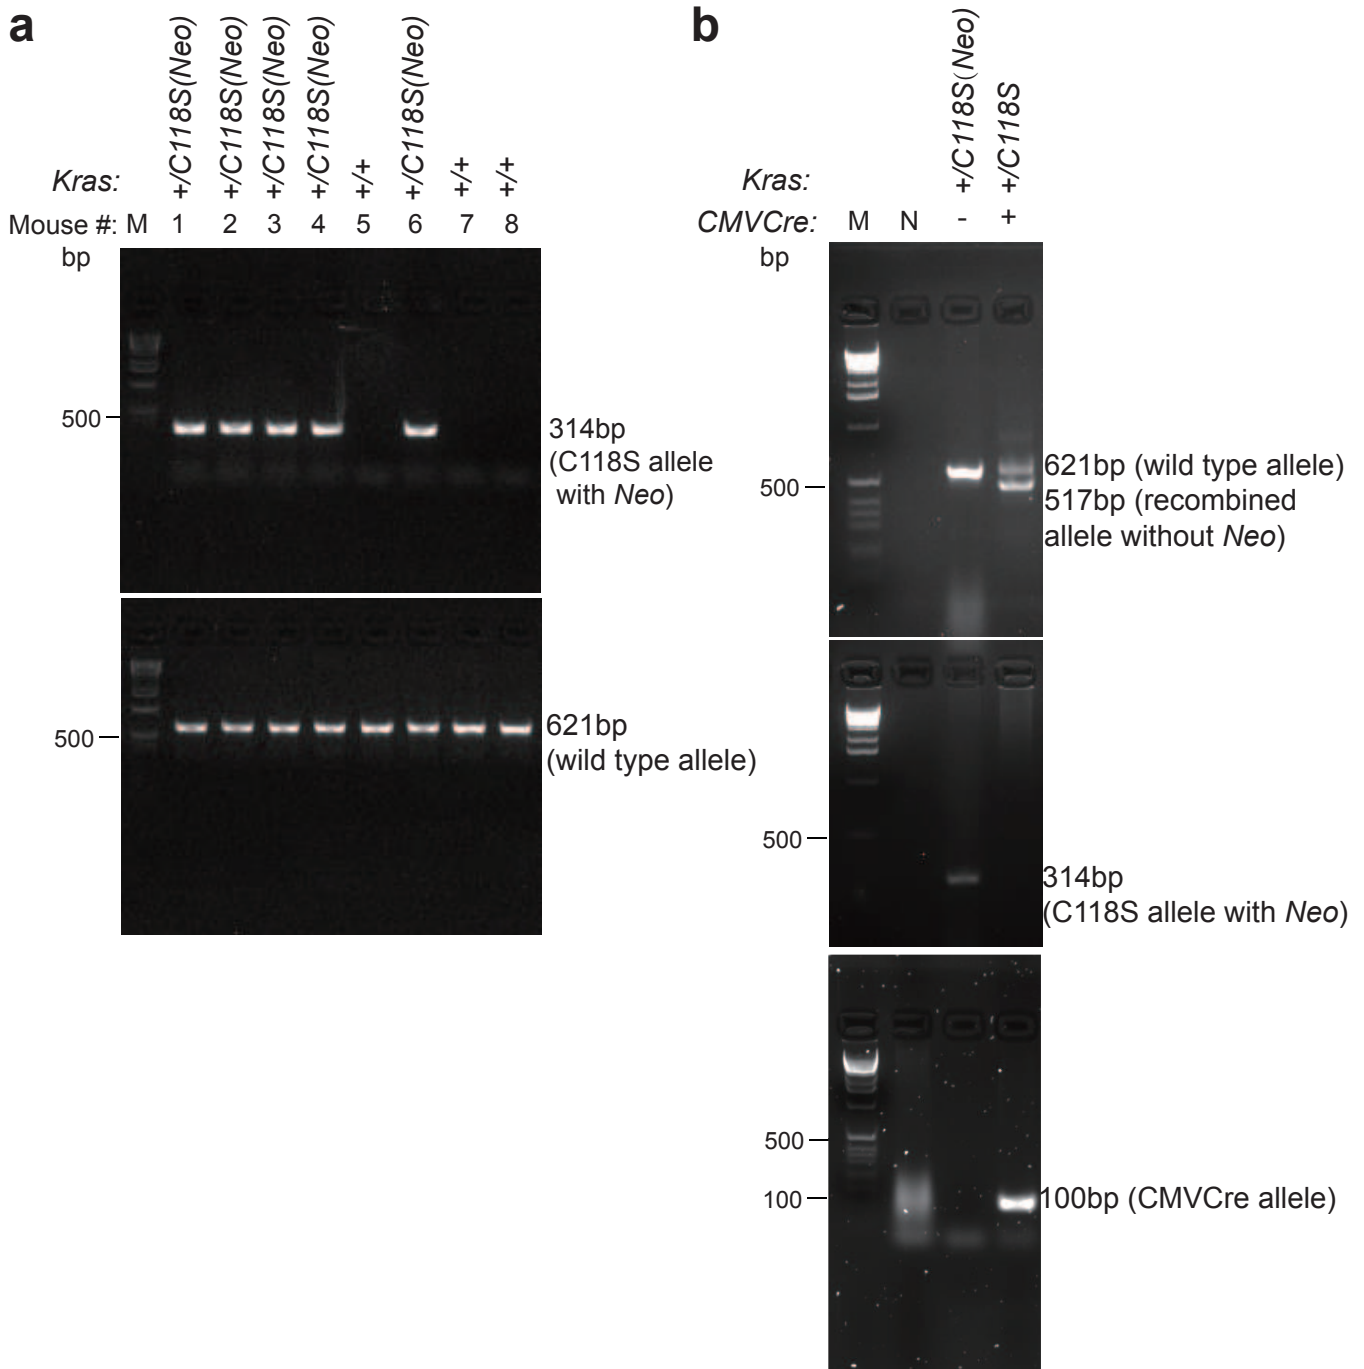

**Supplementary Figure 1 | Identification of successful excision of the *Neo* cassette in the *Kras*<sup>C118S</sup> allele.** (a) Full-length gels of PCR amplification of genomic DNA from eight mice (numbered from 1 to 8) from the breeding of a *Kras*<sup>+/*C118S(Neo)*</sup> mouse and a *Kras*<sup>+/+</sup> (BL6) mouse using the primer pair P3+P4 to amplify a 314 bp product specific to the *Kras*<sup>C118S(Neo)</sup> allele (upper panel) or using the primer pair P3+P5 to amplify a 621 bp product specific to the wild type (+) *Kras* allele (lower panel), identifying the genotype as *Kras*<sup>+/*C118S(Neo)*</sup> or *Kras*<sup>+/+</sup> (labeled on top). (b) Full-length gels of PCR amplification of genomic DNA from a *Kras*<sup>+/*C118S(Neo)*</sup> mouse without transgenic *CMVCre* and a *Kras*<sup>+/*C118S*</sup> mouse with transgenic *CMVCre* using the primer pair P3+P5 to amplify a 621 bp product specific to the wild type (+) *Kras* allele and/or a 517 bp product specific to the *Kras*<sup>C118S</sup> allele after successful excision of the *Neo* cassette (upper panel), using the primer pair P3+P4 to amplify a 314 bp product specific to the *Kras*<sup>C118S(Neo)</sup> allele with the *Neo* cassette (middle panel), or using the *CMVCre* genotyping primer pair P16+P17 to amplify a 100 bp product specific to *CMVCre* (lower panel). M: 1kb marker; N: negative (no DNA) control. All the primers are listed in Supplementary Table 4.

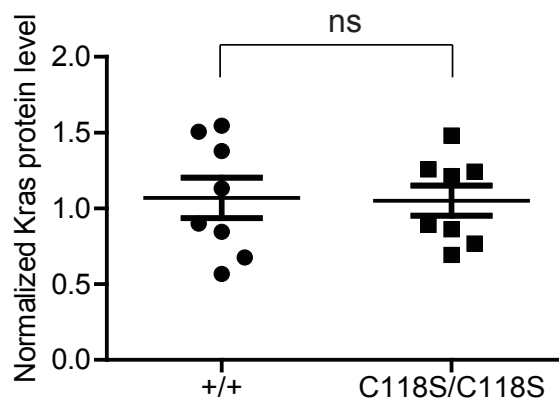

**Supplementary Figure 2 | Similar Kras protein levels in lung tissue isolated from *Kras*<sup>+/+</sup> and *Kras*<sup>C118S/C118S</sup> mice.** Quantification of Kras protein levels (relative to tubulin and actin) from immunoblot of lysates derived from lung tissue of eight *Kras*<sup>+/+</sup> (+/+) and eight *Kras*<sup>C118S/C118S</sup> (C118S/C118S) mice. Bars: Mean  $\pm$  SEM. ns: non-significant ( $P > 0.05$ ), as determined by two-tailed unpaired Student's *t* test.

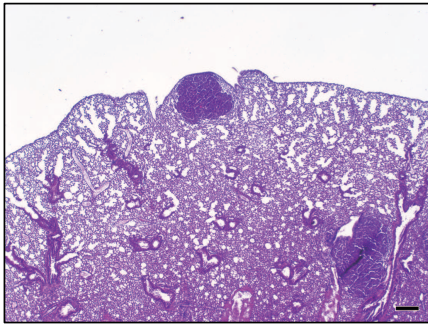

adenoma (2X)

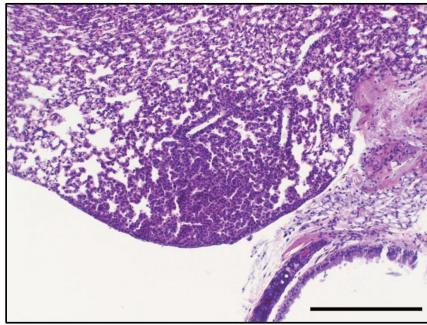

AAH (10X)

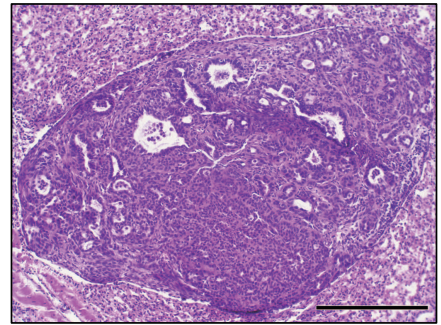

adenocarcinoma (10X)

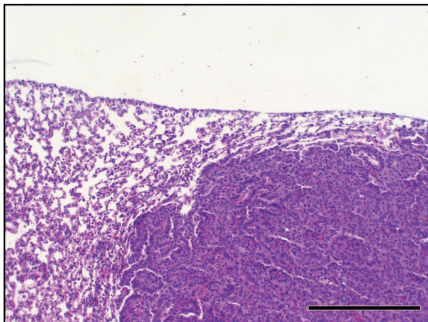

solid adenoma (10X)

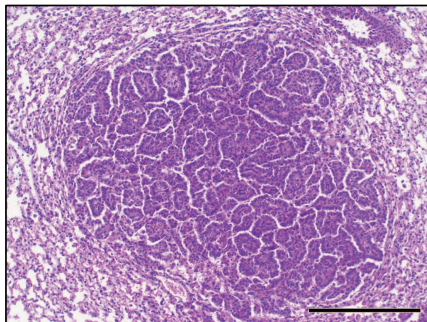

papillary adenoma (10X)

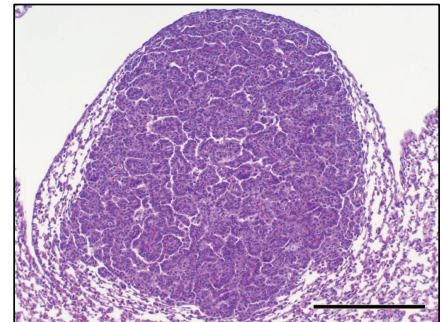

solid/papillary adenoma (10X)

**Supplementary Figure 3 | Representative images of different types of tumors detected in H&E-stained lung sections from urethane-treated mice. Scale bar: 300  $\mu$ m. 2X or 10 X: magnification.**

**a**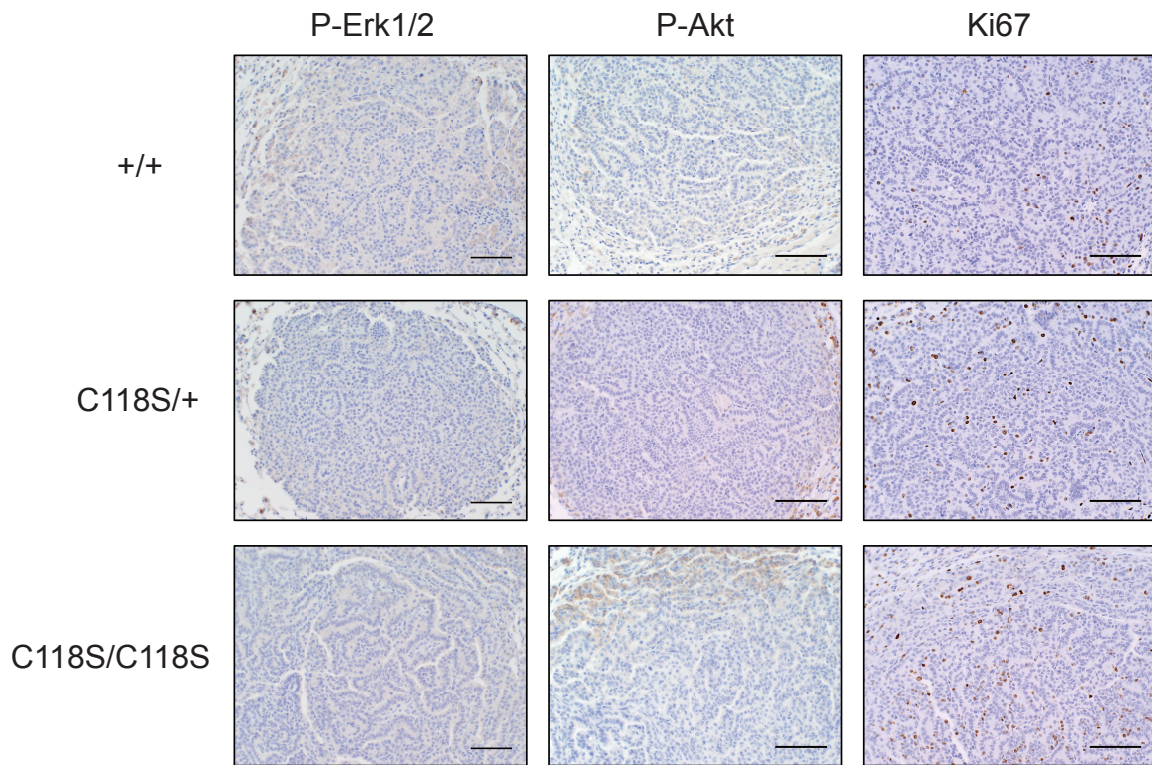**b**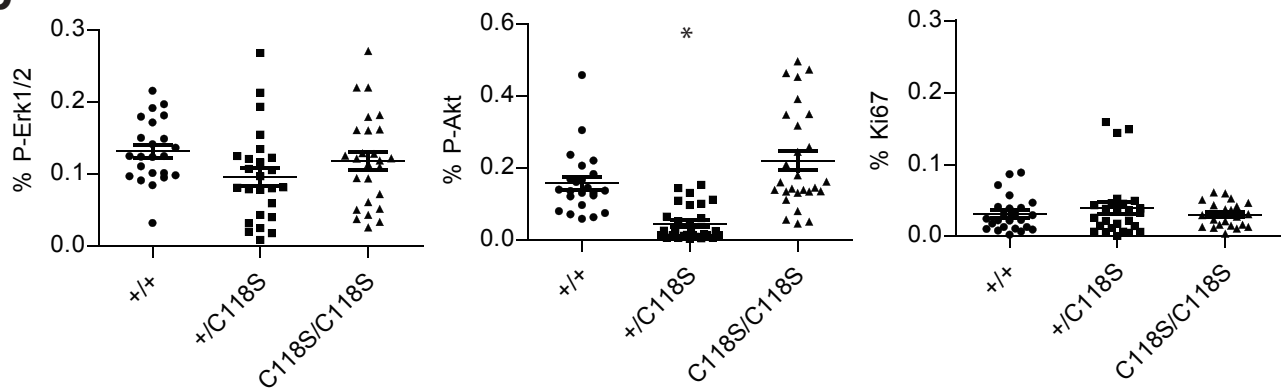

**Supplementary Figure 4 | P-Erk1/2, P-Akt, and Ki67 immunohistochemical analysis of lung tumors.** (a) Representative photograph (scale bar: 100  $\mu$ m) and (b) quantification of the percent positive staining for P-Erk1/2, P-Akt, or Ki67 per tumor area (bars: mean  $\pm$  SEM) from four to six high-power (20X) random fields of lung sections from five mice from each of the *Kras*<sup>+/+</sup> (+/+), *Kras*<sup>+/C118S</sup> (+/C118S), and *Kras*<sup>C118S/C118S</sup> (C118S/C118S) cohorts. No significant difference was noted except in one case (\*:  $P < 0.001$  between C118S/+ versus +/+ or C118S/C118S).



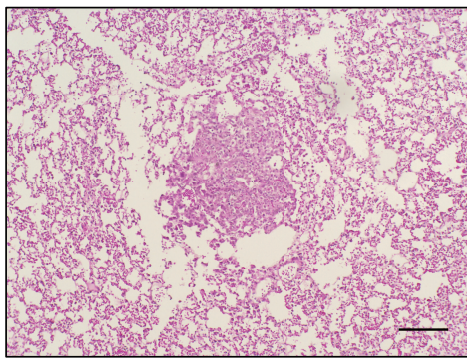

*Kras*<sup>LSL-G12D/+</sup>

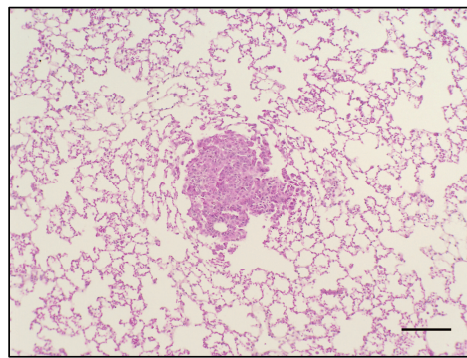

*Kras*<sup>LSL-G12D/C118S</sup>

**Supplementary Figure 5 | A representative image of an H&E stained lung section from an AdCre-treated *Kras*<sup>LSL-G12D/+</sup> or *Kras*<sup>LSL-G12D/C118S</sup> mouse at 4X magnification. Scale bar: 300  $\mu$ m.**

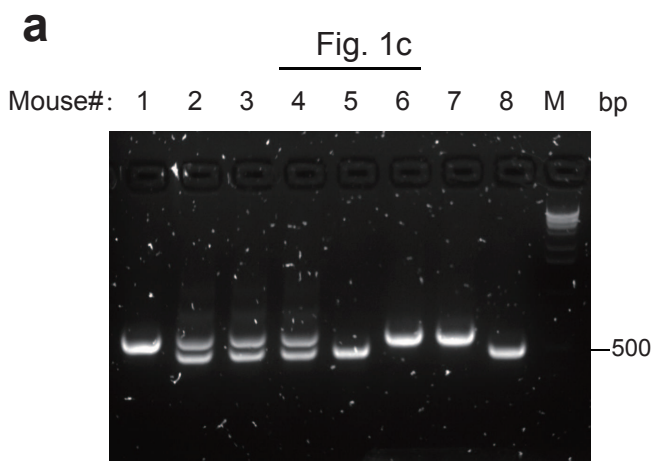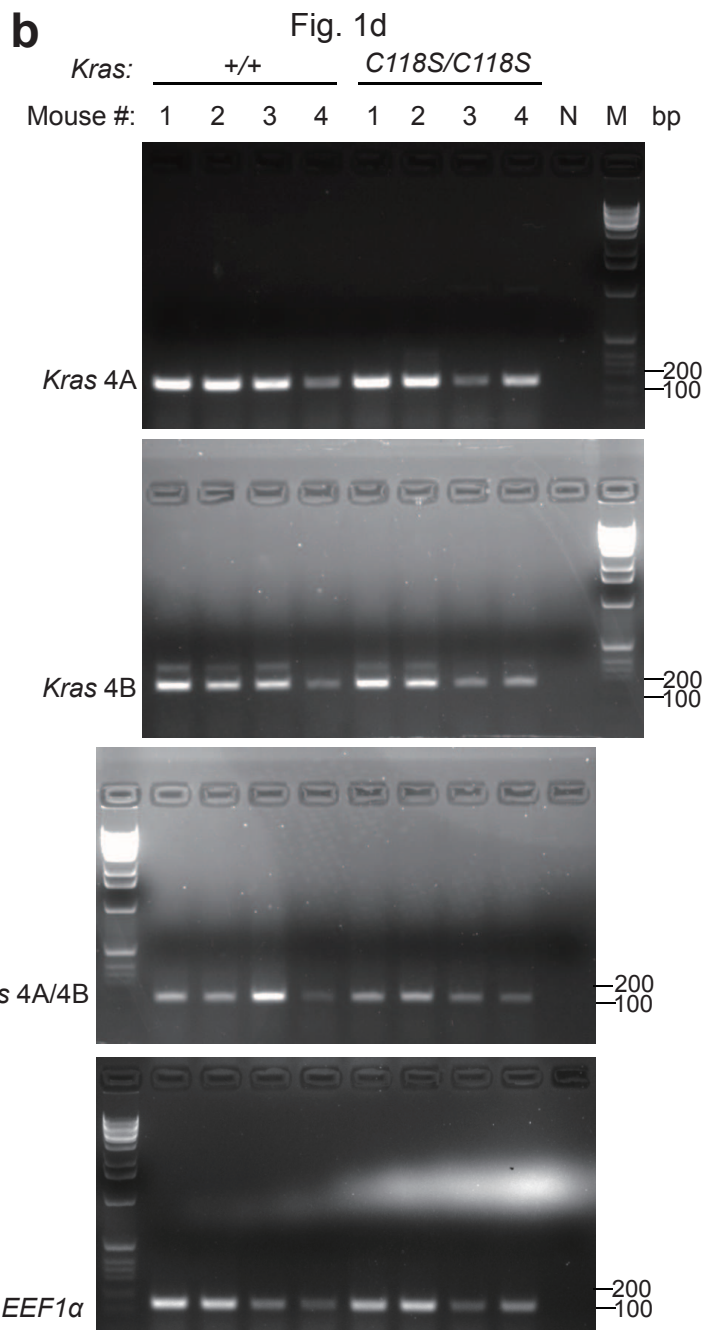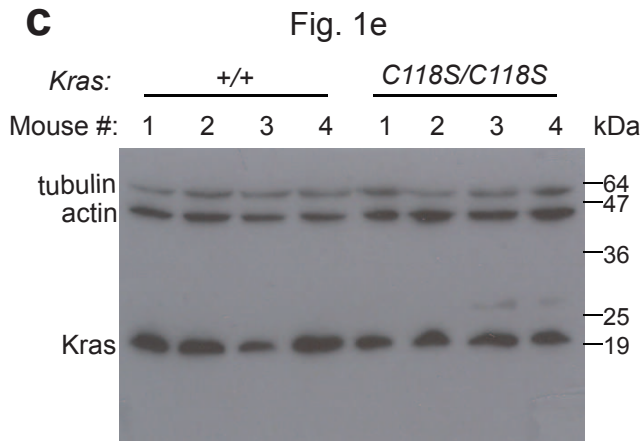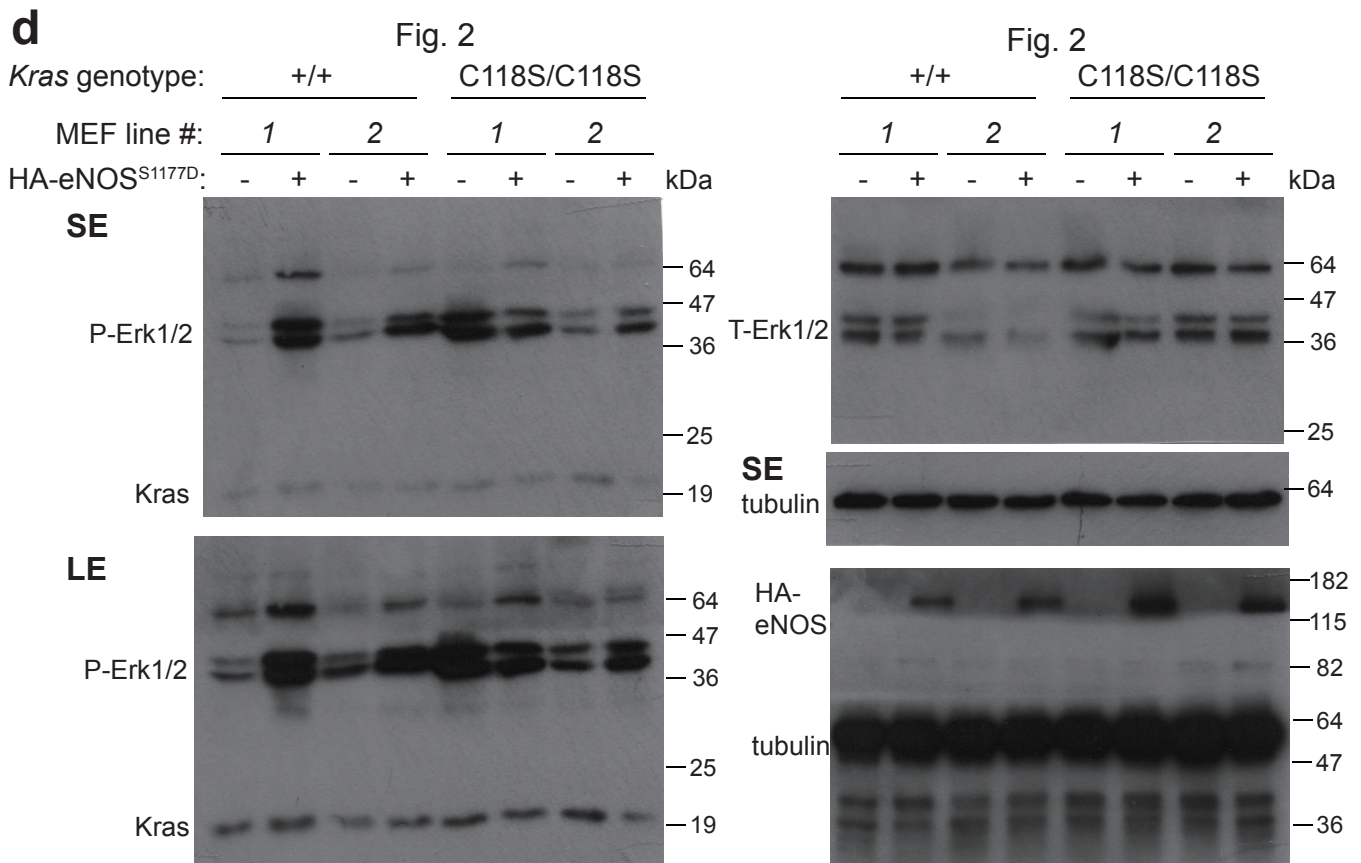

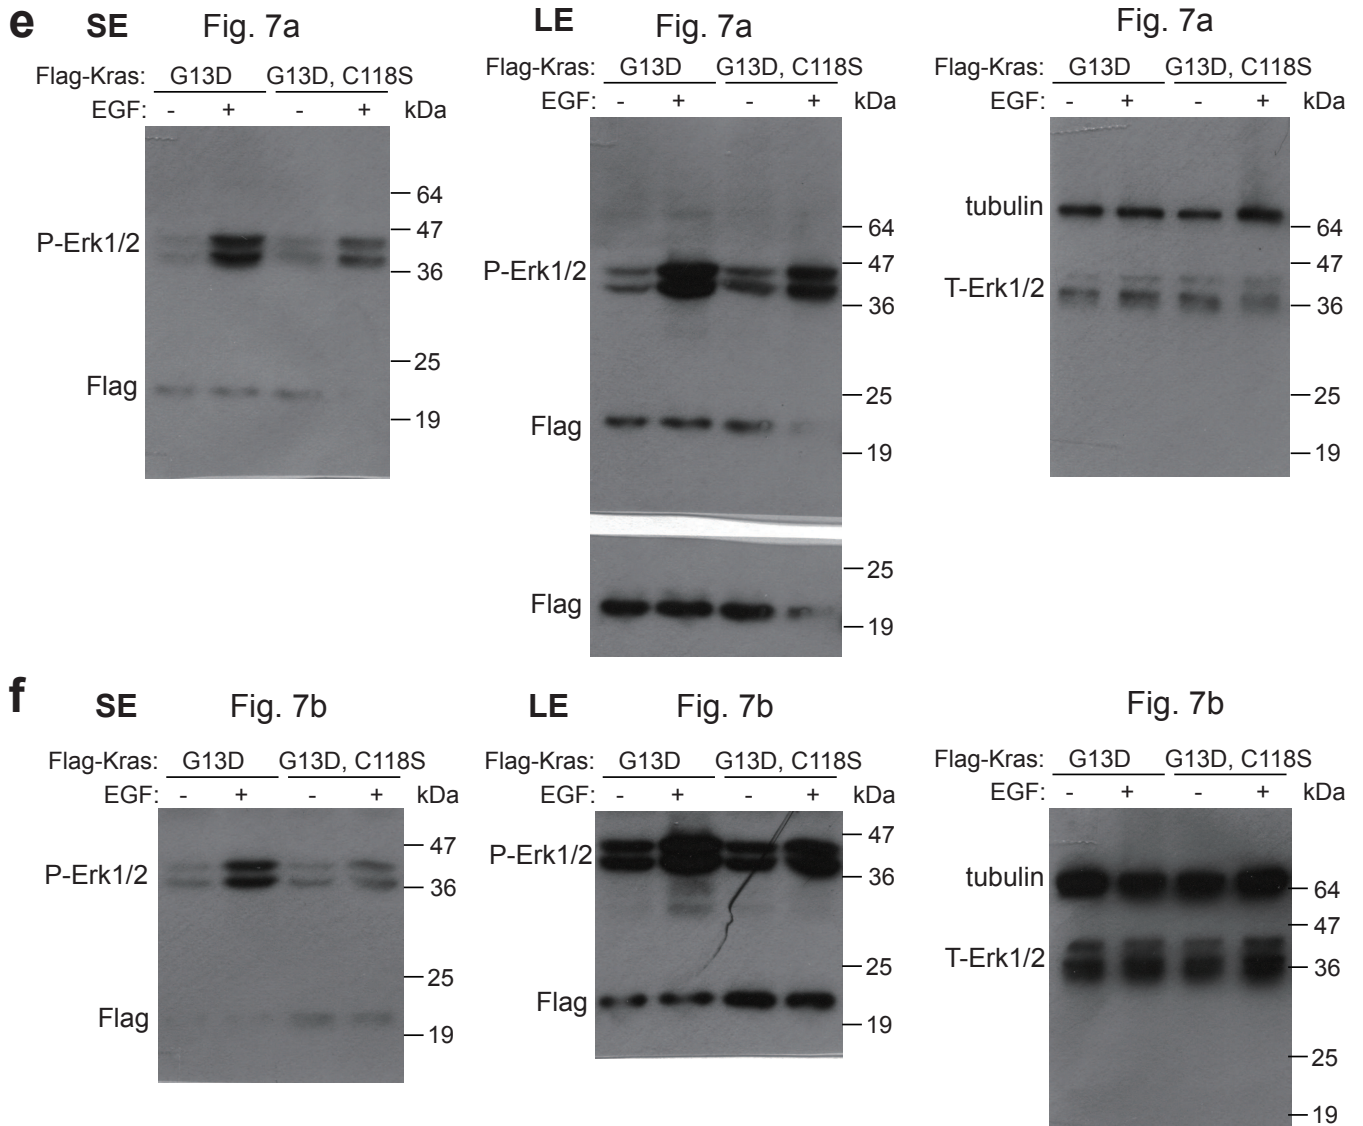

**Supplementary Figure 6 | Full-length gels and blots for figures.** Full-length gels and blots for (a) Fig. 1c, (b) Fig. 1d, (c) Fig. 1e, (d) Fig. 2, (e) Fig. 7a, (f) Fig. 7b. M: Marker; N: negative control; SE: short exposure; LE: long exposure.

**Supplementary Table 1. Histological characterization of lung tumors from urethane-treated mice.**

| <b><i>Kras</i> genotype</b> | <b>Number of lung sections</b> | <b>Tumor incidence</b> | <b>Mean <math>\pm</math> SEM tumors per section</b> | <b>Total number of tumors</b> | <b>Tumor incidence by classification</b> |           |           |
|-----------------------------|--------------------------------|------------------------|-----------------------------------------------------|-------------------------------|------------------------------------------|-----------|-----------|
|                             |                                |                        |                                                     |                               | <b>AAH</b>                               | <b>AD</b> | <b>AC</b> |
| +/+                         | 27                             | 85.2%                  | 2.96 $\pm$ 0.44                                     | 80                            | 11.3%                                    | 85.0%     | 3.8%      |
| +/C118S                     | 25                             | 80.0%                  | 2.28 $\pm$ 0.326                                    | 57                            | 14.0%                                    | 84.2%     | 1.8%      |
| C118S/C118S                 | 25                             | 80.0%                  | 2.00 $\pm$ 0.44                                     | 50                            | 16.0%                                    | 82.0%     | 2.0%      |



**Supplementary Table 2. Subtypes of lung adenomas from urethane-treated mice.**

| <b><i>Kras</i><br/>genotype</b> | <b>Total number<br/>of adenomas</b> | <b>Adenoma incidence by classification</b> |           |                     |
|---------------------------------|-------------------------------------|--------------------------------------------|-----------|---------------------|
|                                 |                                     | Solid                                      | Papillary | Solid/<br>Papillary |
| +/+                             | 68                                  | 39.7%                                      | 16.2%     | 44.1%               |
| +/C118S                         | 48                                  | 37.5%                                      | 4.2%      | 58.3%               |
| C118S/C118S                     | 41                                  | 43.9%                                      | 22.0%     | 34.2%               |

**Supplementary Table 3. *Kras* sequencing analysis from lung tumors of urethane-treated *Kras*<sup>+C118S</sup> mice.**

| <b>Q61 mutation</b>                    | <b>Total</b> | <b>Q61L</b> | <b>Q61R</b> |
|----------------------------------------|--------------|-------------|-------------|
| Present on native <i>Kras</i> allele   | 20           | 8           | 12          |
| Present on C118S <i>Kras</i> allele    | 12           | 0           | 12          |
| Present on both <i>Kras</i> alleles    | 3            | 1           | 2           |
| Absent from both <i>Kras</i> alleles   | 21           |             |             |
| Only one <i>Kras</i> alleles recovered | 9            |             |             |
| Total tumors analyzed                  | 65           | 9           | 26          |

**Supplementary Table 4. PCR primers.**

| <b>Primer</b>                                                        | <b>Sequence</b>                            |
|----------------------------------------------------------------------|--------------------------------------------|
| P1 ( <i>Kras</i> RT-PCR F)                                           | atgactgaatataaacttggtg                     |
| P2 ( <i>Kras</i> RT-PCR R)                                           | ttacataattacacactttgtc                     |
| P3 ( <i>Kras</i> <sup>C118S</sup> genotyping F)                      | agaacaaattaaagagtaaaggac                   |
| P4 ( <i>Kras</i> <sup>C118S</sup> genotyping R-targeting vector)     | ccaagctagcttggtggacgtaaa                   |
| P5 ( <i>Kras</i> <sup>C118S</sup> genotyping R- <i>Kras</i> genomic) | atgtaaaatgtactctagacggaac                  |
| P6 (343F <i>Kras</i> RT-PCR)                                         | tatagggcgaattggagctcatgactgagtataaacttggtg |
| P7 (343R <i>Kras</i> RT-PCR)                                         | cggtatcgataagctttcacataactgtacaccttgctc    |
| P8 ( <i>Kras</i> 4A RT-PCR F)                                        | gggcttctttgtgtatttc                        |
| P9 ( <i>Kras</i> 4A RT-PCR R)                                        | caatgtataaaaagcatcctcca                    |
| P10 ( <i>Kras</i> 4B RT-PCR F)                                       | tgcaatgaggaccagtaca                        |
| P11 ( <i>Kras</i> 4B RT-PCR R)                                       | tagaaggcatcgtaacacc                        |
| P12 ( <i>Kras</i> 4A/4B RT-PCR F)                                    | acttggtggttggtggagctg                      |
| P13 ( <i>Kras</i> 4A/4B RT-PCR R)                                    | ccctcccagttctcatgta                        |
| P14 ( <i>EEF1α</i> RT-PCR F)                                         | ggattgccacacggctcacatt                     |
| P15 ( <i>EEF1α</i> RT-PCR R)                                         | ggtgatagtctgagaagctctc                     |
| P16 (CMV-Cre genotyping F)                                           | gcggtctggcagtaaaaactatc                    |
| P17 (CMV-Cre genotyping R)                                           | gtgaaacagcattgctgtcactt                    |
